# Supplementary material
Source: MDPI journal article supplement (https://www.mdpi.com/2311-7524/9/4/479)
Supplement: s1 [file s1]

## Supplementary Materials

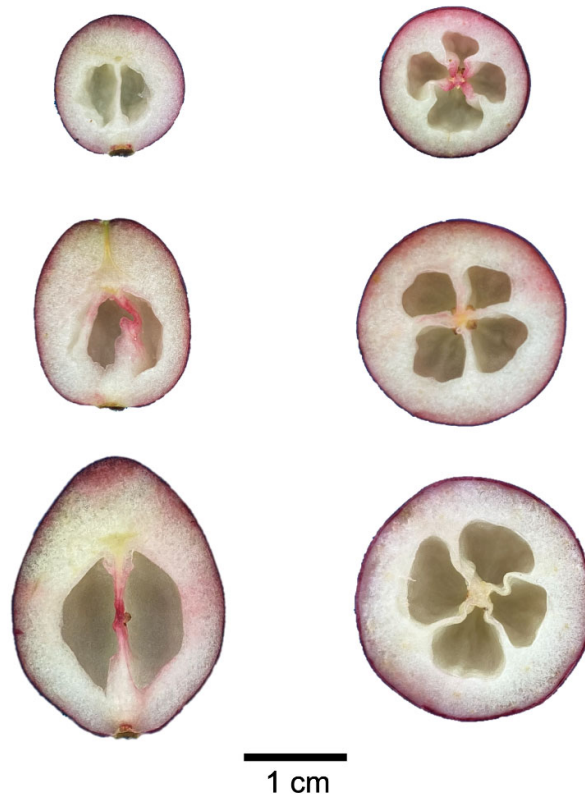

**Figure S1.** Cross sections of cranberry (*Vaccinium macrocarpon* Ait.) fruits of different sizes, showing variations in internal structure.

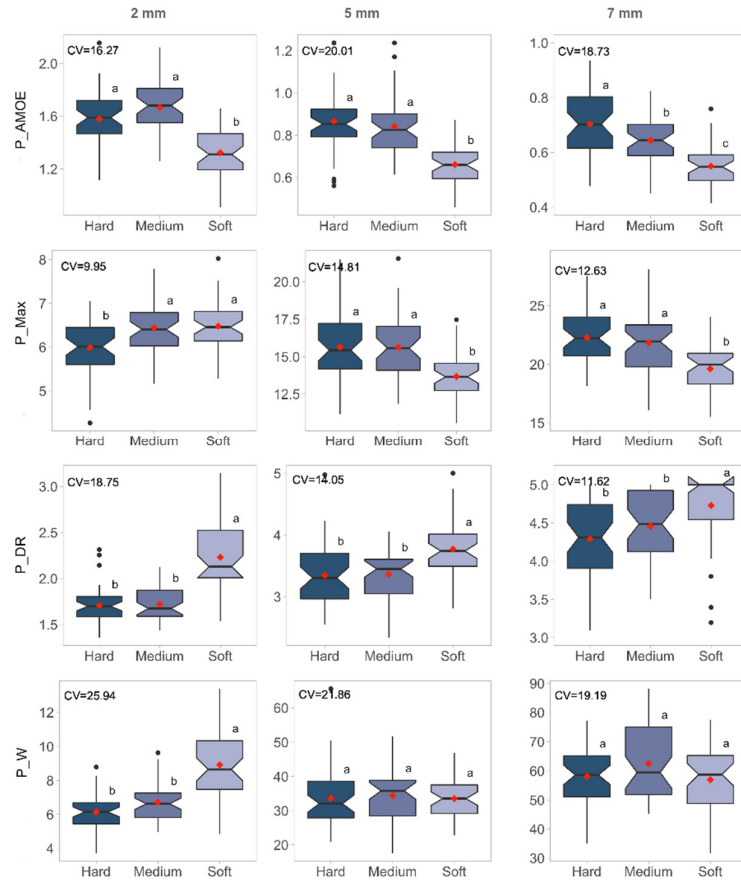

**Figure S2.** Comparison of firmness difference detection between three cranberry (*Vaccinium macrocarpon* Ait.) cultivars with different levels of firmness by puncture method measurements with 2 mm, 5 mm, and 7 mm diameter probes (n = 45 fruits per cultivar per test). Soft fruit cultivars: Yellow Bell; Intermediate fruit cultivars: Sundance; Hard fruit cultivars: Pilgrim King. Boxplot followed by a common letter are not significantly different by Tukey's honestly significant differences test at the 5% level of significance. The coefficient of variation (CV) for each probe diameter test is shown. P\_AMOE: Apparent modulus of elasticity; P\_Max: Maximum force; P\_DR: Deformation at rupture; P\_W: Work.

**Table S1.** Means and coefficients of variation of texture traits measured in cranberry (*Vaccinium macrocarpon* Ait.) fruits using the double compression, puncture, shearing, single compression and Kramer shear cell methodologies. For double compression, puncture, shearing and single compression three hundred fruits were used to perform this analysis. For Kramer shear cell a total of 45 samples (loads) were used. For all methodologies, the samples were equally composed of fruits of the BG (soft), Sundance (intermediate) and M34 (hard) cultivars.

| Double compression |       |                          |
|--------------------|-------|--------------------------|
| Trait              | Mean  | Coefficient of Variation |
| h1                 | 14.01 | 27.65                    |
| h2                 | 15.35 | 28.32                    |
| dsf1               | 9.08  | 22.09                    |

|          |       |       |
|----------|-------|-------|
| dsf2     | 10.93 | 23.03 |
| dW1      | 9.99  | 35.54 |
| dW2      | 10.07 | 36.18 |
| dRf      | 1.01  | 7.54  |
| dRfp     | 14.18 | 29.74 |
| M.dist_1 | 1.5   | 10.07 |
| M.dist_2 | 1.31  | 10.31 |
| sf1      | 1.37  | 26.97 |
| sf2      | 1.63  | 27.71 |
| W1       | 65.42 | 29.21 |
| W2       | 67.09 | 29.94 |
| Rf       | 1.03  | 7.55  |
| Rfp      | 14.42 | 29.77 |
| p.deform | 1.1   | 13.73 |
| pr1      | 4.12  | 21.86 |
| pr2      | 4.67  | 22.76 |
| sp1      | 0.06  | 45.5  |
| sp2      | 0.17  | 30.06 |
| A1       | 27.78 | 23.45 |
| A2       | 28.92 | 24.34 |
| Rp       | 1.04  | 6.41  |
| Rpp      | 4.3   | 23.87 |
| tsf1     | 18.09 | 22.1  |
| tsf2     | 21.77 | 23.02 |
| TW1      | 4.81  | 41.83 |
| TW2      | 4.9   | 41.48 |
| TRf      | 1.17  | 3.20  |
| TRfp     | 16.46 | 27.69 |
| MCP1     | 1.18  | 21.96 |
| MCP2     | 1.34  | 22.93 |
| AMOE1    | 4.84  | 22.59 |
| AMOE2    | 6.53  | 25.28 |

| Puncture |      |                          |
|----------|------|--------------------------|
| Trait    | Mean | Coefficient of variation |
| P_AMOE   | 1.69 | 21.64                    |
| P_Max    | 6.99 | 19.24                    |
| P_DR     | 1.92 | 13.21                    |
| P_W      | 7.85 | 25.83                    |

  

| Shearing |        |                          |
|----------|--------|--------------------------|
| Trait    | Mean   | Coefficient of variation |
| S_Max    | 35.88  | 19.63                    |
| S_W      | 218.86 | 27.84                    |
| S_DF     | 51.05  | 18.71                    |

| Single compression |         |                          |
|--------------------|---------|--------------------------|
| Trait              | Mean    | Coefficient of variation |
| SC_RD              | 6.84    | 11.56                    |
| SC_RF              | 6562.48 | 21.98                    |

  

| Kramer shear cell |         |                          |
|-------------------|---------|--------------------------|
| Trait             | Mean    | Coefficient of variation |
| K_Max             | 827.37  | 7.50                     |
| K_W               | 9768.71 | 6.71                     |

**Table S2.** Statistical comparison of double compression measurements for three cranberry (*Vaccinium macrocarpon* Ait.) cultivars with soft (Yellow bell), medium (Sundance), and hard (M34) fruits taken at 7.77 and 21.66 °C. For each temperature, 50 fruits of each cultivar were measured. Means, coefficients of variation, and Fisher values were calculated individually for each temperature. The *p*-values of the Tukey tests between temperatures are shown in column 8. The significance of the *p*-values of each ANOVA and Tukey tests are indicated with '\*' signifying a *p*-value between .05 and .01, '\*\*' means a *p*-value between .01 and .001 and '\*\*\*' means a *p*-value less than .001.

| Trait                                  | Mean    |          | Coefficient of variation |          | Differences Detected |          | <i>p</i> -value | FT <sup>a</sup> |
|----------------------------------------|---------|----------|--------------------------|----------|----------------------|----------|-----------------|-----------------|
| Measurements independent of graph type |         |          |                          |          |                      |          |                 |                 |
|                                        | 7.77 °C | 21.66 °C | 7.77 °C                  | 21.66 °C | 7.77 °C              | 21.66 °C |                 |                 |
| h1                                     | 13.56   | 13.31    | 28.47                    | 23.68    | 3                    | 3        | 0.73            | -0.13           |
| h2                                     | 14.64   | 14.49    | 29.07                    | 23.93    | 3                    | 3        | 0.85            | -0.07           |
| MCP1                                   | 1.12    | 1.1      | 17.1                     | 15.82    | 3                    | 3        | 0.54            | -0.12           |
| MCP2                                   | 1.25    | 1.23     | 18.17                    | 15.67    | 3                    | 3        | 0.77            | -0.11           |
| M.dist_1                               | 1.51    | 1.52     | 8.24                     | 8.31     | 2                    | 2        | 0.73            | 0.04            |
| M.dist_2                               | 1.35    | 1.34     | 7.75                     | 9.09     | 2                    | 2        | 0.87            | -0.02           |
| p.deform                               | 1.01    | 1.06     | 16.63                    | 12.49    | 2                    | 2        | 0.11            | 0.35            |
| Force (N) / Distance (mm) graph        |         |          |                          |          |                      |          |                 |                 |
| dsf1                                   | 8.78    | 8.66     | 22.52                    | 17.28    | 3                    | 3        | 0.76            | -0.09           |
| dsf2                                   | 10.34   | 10.27    | 23.36                    | 17.79    | 3                    | 3        | 0.88            | -0.04           |
| dW1                                    | 9.53    | 9.41     | 35.28                    | 30.22    | 3                    | 2        | 0.85            | -0.09           |
| dW2                                    | 9.23    | 9.28     | 36.45                    | 30.23    | 3                    | 3        | 0.95            | 0.03            |
| dRf                                    | 0.97    | 0.99     | 2.98                     | 2.32     | 2                    | 2        | ***             | 0.14            |
| dRfp                                   | 13.4    | 13.54    | 29.78                    | 23.92    | 3                    | 3        | 0.99            | 0.07            |
| Force (N) / Strain (%) graph           |         |          |                          |          |                      |          |                 |                 |
| sf1                                    | 1.34    | 1.32     | 28.8                     | 22.49    | 3                    | 3        | 0.81            | -0.10           |
| sf2                                    | 1.56    | 1.54     | 29.41                    | 22.97    | 3                    | 3        | 0.89            | -0.09           |
| W1                                     | 62      | 61.12    | 28.72                    | 24.07    | 3                    | 3        | 0.80            | -0.10           |
| W2                                     | 61.02   | 61.32    | 29.87                    | 24.24    | 3                    | 3        | 0.93            | 0.03            |

|                                  |       |       |       |       |   |   |      |       |
|----------------------------------|-------|-------|-------|-------|---|---|------|-------|
| Rf                               | 0.98  | 1     | 3     | 2.38  | 2 | 2 | ***  | 0.14  |
| Rfp                              | 13.54 | 13.7  | 29.78 | 23.95 | 3 | 3 | 0.99 | 0.08  |
| Force (N) / Time (seconds) graph |       |       |       |       |   |   |      |       |
| tsf1                             | 17.49 | 17.25 | 22.54 | 17.28 | 3 | 3 | 0.75 | -0.09 |
| tsf2                             | 20.59 | 20.45 | 23.45 | 17.85 | 3 | 3 | 0.88 | -0.04 |
| tW1                              | 4.79  | 4.73  | 35.24 | 30.22 | 3 | 2 | 0.86 | -0.09 |
| tW2                              | 4.65  | 4.67  | 36.27 | 30.1  | 3 | 3 | 0.95 | 0.03  |
| tRf                              | 0.97  | 0.99  | 2.87  | 2.36  | 2 | 2 | **   | 0.14  |
| tRfp                             | 13.16 | 13.14 | 29.62 | 23.81 | 3 | 3 | 0.98 | -0.01 |
| Stress (N/) / Strain (%)         |       |       |       |       |   |   |      |       |
| pr1                              | 3.81  | 3.76  | 17.17 | 15.17 | 3 | 3 | 0.70 | -0.09 |
| pr2                              | 4.26  | 4.19  | 18.05 | 15.66 | 3 | 3 | 0.96 | -0.11 |
| sp1                              | 0.15  | 0.13  | 43.42 | 44.54 | 2 | 2 | 0.05 | -0.95 |
| sp2                              | 0.17  | 0.15  | 25.19 | 51.58 | 2 | 2 | 0.06 | -0.84 |
| A1                               | 25.64 | 25.14 | 17.73 | 15.96 | 3 | 3 | 0.58 | -0.14 |
| A2                               | 25.64 | 25.8  | 18.59 | 16.78 | 3 | 3 | 0.86 | 0.04  |
| Rp                               | 1     | 1.03  | 3.36  | 2.57  | 2 | 2 | ***  | 0.21  |
| Rpp                              | 3.81  | 3.86  | 18.37 | 16.15 | 3 | 2 | 0.72 | 0.09  |

<sup>a</sup>Firmness-temperature coefficient

**Table S3.** The Fisher values of ANOVA tests performed on texture measurements collected using different combinations of speed and strain for parallel plate double compression tests run on cranberry (*Vaccinium macrocarpon* Ait.) fruit in a central composite design experiment for three different cranberry cultivars that vary in firmness. Fruits of the BG, Stevens and A9 cultivars were considered as soft, intermediate and hard respectively. The *p*-values associated with each ANOVA are indicated after each Fisher value with '\*' signifying a *p*-value between .05 and .01, '\*\*\*' signifying a *p*-value between .01 and .001 and '\*\*\*' signifying a *p*-value less than .001.

| Strain | Speed | h1       | h2       | MCP1     | MCP2     | M.dist_1 | M.dist_2 | p.defor<br>m | AMOE1    | AMOE2   |
|--------|-------|----------|----------|----------|----------|----------|----------|--------------|----------|---------|
| 22.5   | 1     | 1.88     | 1.28     | 40.4***  | 23.94*** | 12.4***  | 3.75*    | 16.56***     | 23.82*** | 6.11**  |
| 35     | 3.05  | 2.44***  | 2.24***  | 10.51*** | 7.09**   | 11.1**   | 5.66**   | 16.07***     | 4.55*    | 2.48    |
| 5      | 8     | 32.55*** | 30.87*** | 12.36*** | 11.54*** | 17.91*** | 15.99*** | 1.74**       | 5.18     | 4.98    |
| 40     | 8     | 10.37*** | 6.77***  | 4.24**   | 2.5      | 12.82*** | 2.79***  | 12.62**      | 14.14    | 3.8     |
| 35     | 12.95 | 2.23***  | 0.67***  | 10.42**  | 12.05**  | 9.42***  | 3.71***  | 1.79*        | 8.88*    | 9.2**   |
| 22.5   | 15    | 11.05*** | 8.78***  | 22.6**   | 15.47**  | 8.85***  | 5.58***  | 0.82*        | 12       | 6.68*   |
| 22.5   | 8     | 1.39***  | 0.74***  | 8.07***  | 3.94***  | 3.17***  | 1.68***  | 9.9***       | 5.01**   | 2.23    |
| 22.5   | 8     | 19.31    | 16.88    | 13.93*** | 5.45**   | 7.13***  | 6.91**   | 14.27***     | 3.19*    | 0.84    |
| 22.5   | 8     | 9.03***  | 9.46***  | 8.7***   | 8.22***  | 19.46*** | 9.08***  | 6.14         | 2.24**   | 1.55**  |
| 22.5   | 8     | 25.33*** | 23.28**  | 6.64*    | 2.92     | 14.95*** | 7.6      | 7.21***      | 0.61***  | 0.06*   |
| 22.5   | 8     | 23.36    | 21.62    | 6.55***  | 7.25***  | 23.41*** | 25.87*   | 4.04         | 3.95***  | 5.08*** |
| 10     | 3.05  | 17.98*** | 16.74*** | 5.24***  | 6.4***   | 16.92*** | 19.76**  | 4.04         | 1.71***  | 4.55**  |
| 10     | 12.95 | 22.73    | 19.06    | 17.46*** | 9.65*    | 12.52*   | 21.09    | 9.6***       | 7.11**   | 1.78    |
| Strain | Speed | dsf1     | dsf2     | dW1      | dW2      | dRf      | dRfp     | sf1          | sf2      | W1      |
| 22.5   | 1     | 15.09*** | 7.5***   | 2.25     | 3.43*    | 2.75     | 3.37*    | 1.3          | 0.63     | 2.61    |
| 35     | 3.05  | 1.15***  | 1.6***   | 5.13*    | 3.22*    | 3.69     | 3.79     | 1.68***      | 1.25***  | 5.72*   |

| 5      | 8     | 21.49    | 19.31    | 32.57*   | 27.34*** | 1.55*    | 23.82**  | 27.3***  | 25.05*** | 34.42   |
|--------|-------|----------|----------|----------|----------|----------|----------|----------|----------|---------|
| 40     | 8     | 2.62***  | 1.54***  | 3.83***  | 1.24**   | 1.7*     | 2.28     | 6.06***  | 0.68***  | 2.07*** |
| 35     | 12.95 | 3.41***  | 4.32***  | 0.36*    | 0.52***  | 0.13     | 0.12**   | 0.75***  | 0.65***  | 0.09    |
| 22.5   | 15    | 15.51*** | 12.35*** | 1.91***  | 2.77***  | 1.66     | 1.61***  | 9.23***  | 7.2***   | 1.9***  |
| 22.5   | 8     | 4.16***  | 2.17***  | 3.05***  | 0.34***  | 2.27     | 1.47***  | 1.07***  | 0.47***  | 2.74*** |
| 22.5   | 8     | 20.09    | 12.52    | 3.39**   | 4.05*    | 2.1*     | 1.43*    | 17.92    | 14.05    | 3.18**  |
| 22.5   | 8     | 1.9***   | 1.68***  | 3.11***  | 8.08***  | 3.82     | 6.72***  | 7.86***  | 8.69***  | 2.54*** |
| 22.5   | 8     | 19.67    | 17.95    | 13.39*   | 7.12     | 3.95     | 0.85     | 22.26**  | 21.83    | 10.9    |
| 22.5   | 8     | 14.51*   | 9.59*    | 4.8      | 13.95    | 2.29     | 6.83     | 22.13    | 18.76    | 2.35    |
| 10     | 3.05  | 12.28*** | 11.95*** | 16.49    | 19.45    | 1.91     | 19.85    | 17.03*** | 15.01**  | 13.85   |
| 10     | 12.95 | 33.75*   | 14.95    | 14.16    | 20.65    | 2.05     | 20.37    | 24.96    | 15.38    | 13.55   |
| Strain | Speed | W2       | Rf       | Rfp      | tsf1     | tsf2     | TW1      | TW2      | tRf      | tRfp    |
| 22.5   | 1     | 4.7*     | 2.78     | 3.27*    | 15.08*** | 7.47**   | 2.24     | 3.4*     | 2.72     | 3.36*   |
| 35     | 3.05  | 1.7      | 3.65     | 3.78     | 1.12***  | 1.58***  | 4.91*    | 1.71**   | 4.06     | 4.06    |
| 5      | 8     | 26.55*   | 1.73*    | 23.74**  | 25.17    | 21.02    | 27.85*   | 13.06*** | 3.22*    | 5.04**  |
| 40     | 8     | 0.31*    | 1.6*     | 2.2      | 2.61***  | 1.44***  | 4.01***  | 1.5***   | 1.77*    | 2.4     |
| 35     | 12.95 | 0.03***  | 0.15     | 0.13**   | 2.96***  | 3.66***  | 0.86**   | 2.05***  | 0.03     | 0.19*** |
| 22.5   | 15    | 1.9***   | 1.69     | 1.64***  | 14.4***  | 11.52*** | 7.64***  | 9.15***  | 0.15     | 4.54*** |
| 22.5   | 8     | 0.01***  | 2.33     | 1.51***  | 3.94***  | 2.02***  | 3.04***  | 0.38***  | 2.17     | 1.1***  |
| 22.5   | 8     | 2.57     | 2.19*    | 1.47*    | 20.56    | 12.54    | 4.08**   | 5.89     | 1.79*    | 1.81*   |
| 22.5   | 8     | 4.55***  | 3.78     | 6.71***  | 2.02***  | 1.84***  | 3.6***   | 9.65***  | 3.96*    | 7.45**  |
| 22.5   | 8     | 4.53     | 3.95     | 0.88     | 20.33    | 18.24    | 14.91*   | 10.15    | 3.39     | 0.68    |
| 22.5   | 8     | 8.52     | 2.29     | 6.7      | 15.03    | 10.16*   | 5.96     | 15.99    | 1.97     | 8.71    |
| 10     | 3.05  | 17.14    | 1.78     | 19.75    | 12.51*** | 12.16*** | 11.47*** | 13.18*** | 1.88     | 11.42*  |
| 10     | 12.95 | 24.57    | 1.9      | 20.01    | 30.9*    | 15.86    | 19.23    | 23.73    | 0.77     | 20.5    |
| Strain | Speed | pr1      | pr2      | sp1      | sp2      | A1       | A2       | Rp       | Rpp      |         |
| 22.5   | 1     | 39.96*** | 25.34*** | 11.54*** | 23.71*** | 30.88*** | 14.13*** | 6.43**   | 12.57*** |         |
| 35     | 3.05  | 9.35***  | 8.63**   | 12.92*** | 15.88*** | 19.61    | 2.13**   | 7.98     | 5.98     |         |
| 5      | 8     | 12.43*** | 11.81*** | 8.13***  | 7.02***  | 13.32**  | 10.5     | 0.58*    | 9.36     |         |
| 40     | 8     | 5.79**   | 5.95*    | 23.87*** | 22.98*** | 3.48     | 1.16     | 8.49     | 9.27     |         |
| 35     | 12.95 | 11.99**  | 14.48**  | 25.33*** | 21.86*** | 2.99     | 8.49*    | 2.39     | 3.03*    |         |
| 22.5   | 15    | 22.08**  | 18.97**  | 14.22**  | 23.44*** | 2.27*    | 2.43     | 1.27*    | 0.46*    |         |
| 22.5   | 8     | 8.83***  | 5.88***  | 10.16    | 7.48***  | 0.34**   | 1.71***  | 0.87     | 1.69*    |         |
| 22.5   | 8     | 13.45*** | 5.41***  | 14.49*** | 24.01*** | 1.15***  | 4.89     | 1.05***  | 0.83**   |         |
| 22.5   | 8     | 8.55***  | 7.53***  | 29.09*** | 17.09**  | 5.3***   | 0.25***  | 3.2      | 1.59***  |         |
| 22.5   | 8     | 6.76**   | 4.42**   | 21.69*** | 18.63*** | 0.76*    | 3.06     | 0.81***  | 1.37***  |         |
| 22.5   | 8     | 6.87***  | 5.76***  | 14.52*** | 43.62*** | 1.41     | 3.8***   | 2.12     | 3.73     |         |
| 10     | 3.05  | 5.28***  | 7.09***  | 7.15***  | 18.11*** | 3.35     | 3.06     | 3.78     | 4.31     |         |
| 10     | 12.95 | 18.24*** | 10.33**  | 0.8***   | 8.6**    | 7.2      | 16.35    | 0.26     | 4.25     |         |
